# Supplementary material for: Genetic and epidemiological insights into the emergence of peste des petits ruminants virus (PPRV) across Asia and Africa
Source: PubMed Central journal article supplement (PMC4229660; doi:10.1038/srep07040), 2014-11-13
Supplement: srep07040-s1.pdf [file srep07040-s1.pdf]

**Title:** Genetic and epidemiological insights into the emergence of peste des petits ruminants virus (PPRV) across Asia and Africa

**Authors:** Abinash Padhi, Li Ma

PPRV Nucleocapsid gene sequence information.

| GenBank Nucleotide accession number | Country of origin | Year of isolation |
|-------------------------------------|-------------------|-------------------|
| DQ840165                            | Senegal           | 1968              |
| DQ840158                            | Sudan             | 1972              |
| DQ840161                            | Nigeria           | 1975              |
| DQ840162                            | Nigeria           | 1975              |
| DQ840160                            | Nigeria           | 1975              |
| DQ840163                            | Ghana             | 1976              |
| DQ840164                            | Nigeria           | 1976              |
| DQ840167                            | Ghana             | 1978              |
| DQ840166                            | Ghana             | 1978              |
| DQ840168                            | Oman              | 1983              |
| DQ840169                            | UAE               | 1986              |
| DQ840172                            | BurkinaFaso       | 1988              |
| DQ840170                            | Guinea            | 1988              |
| DQ840199                            | CtedIvoire        | 1989              |
| DQ840171                            | Guinea            | 1989              |
| DQ840173                            | Israel            | 1993              |
| DQ840174                            | Senegal           | 1994              |
| DQ840175                            | Ethiopia          | 1994              |
| DQ840176                            | India             | 1994              |
| DQ840179                            | India             | 1994              |
| DQ840180                            | India             | 1994              |
| DQ840177                            | India             | 1995              |
| DQ840178                            | India             | 1995              |
| DQ840182                            | India             | 1995              |
| DQ840181                            | Israel            | 1995              |
| DQ840183                            | Ethiopia          | 1996              |
| DQ840184                            | Turkey            | 1996              |
| HQ131960                            | Cameroon          | 1997              |
| DQ840185                            | Iran              | 1998              |
| DQ840186                            | Iran              | 1998              |

|          |             |      |
|----------|-------------|------|
| DQ840191 | Israel      | 1998 |
| DQ840188 | Israel      | 1998 |
| DQ840189 | Israel      | 1998 |
| DQ840190 | Israel      | 1998 |
| DQ840192 | Mali        | 1999 |
| DQ840195 | SaudiArabia | 1999 |
| DQ840197 | SaudiArabia | 1999 |
| DQ840198 | Tajikistan  | 2004 |
| HQ131962 | CAR         | 2004 |
| DQ267188 | India       | 2005 |
| DQ267191 | India       | 2005 |
| DQ267192 | India       | 2005 |
| DQ267189 | India       | 2005 |
| DQ267190 | India       | 2005 |
| EU068731 | China       | 2007 |
| EU340363 | China       | 2007 |
| HQ131961 | Bangladesh  | 2009 |
| HQ131963 | Senegal     | 2010 |
| HQ131933 | Sudan       | 2000 |
| HQ131935 | Sudan       | 2004 |
| HQ131947 | Sudan       | 2004 |
| HQ131934 | Sudan       | 2005 |
| HQ131936 | Sudan       | 2005 |
| HQ131948 | Sudan       | 2005 |
| HQ131937 | Sudan       | 2006 |
| HQ131938 | Sudan       | 2006 |
| HQ131939 | Sudan       | 2007 |
| HQ131940 | Sudan       | 2007 |
| HQ131941 | Sudan       | 2007 |
| HQ131942 | Sudan       | 2008 |
| HQ131922 | Sudan       | 2008 |
| HQ131943 | Sudan       | 2008 |
| HQ131944 | Sudan       | 2008 |
| HQ131945 | Sudan       | 2009 |
| HQ131932 | Sudan       | 2009 |
| HQ131931 | Sudan       | 2008 |
| HQ131929 | Sudan       | 2000 |
| HQ131930 | Sudan       | 2000 |
| HQ131920 | Sudan       | 2000 |
| HQ131917 | Sudan       | 2000 |
| HQ131921 | Sudan       | 2008 |

|          |             |      |
|----------|-------------|------|
| HQ131918 | Sudan       | 1971 |
| HQ131919 | Sudan       | 2000 |
| HQ131946 | Sudan       | 2000 |
| HQ131923 | Morocco     | 2008 |
| HQ131924 | Morocco     | 2008 |
| HQ131925 | Morocco     | 2008 |
| HQ131926 | Morocco     | 2008 |
| HQ131927 | Morocco     | 2008 |
| HQ131928 | Morocco     | 2008 |
| FJ750560 | India_2003  | 2003 |
| FJ750559 | India       | 2005 |
| JQ519963 | Turkey      | 2011 |
| JQ519959 | Turkey      | 2011 |
| JQ519955 | Turkey      | 2011 |
| JQ519951 | Turkey      | 2011 |
| JQ519947 | Turkey      | 2011 |
| JQ519910 | Turkey      | 2011 |
| JQ519935 | Turkey      | 2011 |
| JQ388650 | Turkey      | 2011 |
| JQ388646 | Turkey      | 2011 |
| JQ388639 | Turkey      | 2011 |
| JQ388634 | Turkey      | 2010 |
| JQ388630 | Turkey      | 2011 |
| JQ388626 | Turkey      | 2011 |
| JQ388622 | Turkey      | 2011 |
| JQ388618 | Turkey      | 2011 |
| JQ388664 | Turkey      | 2011 |
| JQ388660 | Turkey      | 2010 |
| JQ388656 | Turkey      | 2011 |
| JQ388652 | Turkey      | 2011 |
| JQ388648 | Turkey      | 2011 |
| JQ388640 | Turkey      | 2011 |
| JQ388636 | Turkey      | 2010 |
| JQ388620 | Turkey      | 2011 |
| JQ388616 | Turkey      | 2011 |
| JF969755 | Iraq        | 2011 |
| JN602079 | SierraLeone | 2009 |
| JN602080 | SierraLeone | 2009 |
| JN602081 | SierraLeone | 2009 |
| JN602082 | SierraLeone | 2009 |
| DQ840193 | Mali        | 1999 |

|          |            |      |
|----------|------------|------|
| DQ840194 | Mali       | 1999 |
| EU267274 | Nigeria    | 1976 |
| JN202926 | Egypt      | 2010 |
| JN202925 | Egypt      | 2010 |
| JN202924 | Egypt      | 2010 |
| JN632532 | India      | 2007 |
| JF276436 | Bangladesh | 2008 |
| JN009673 | Pakistan   | 2010 |
| JN009674 | Pakistan   | 2010 |
| FJ795511 | Dubai      | 2009 |
| GQ122187 | India      | 2008 |
| GQ122186 | India      | 2008 |
| GQ122188 | India      | 2008 |
| GQ122189 | India      | 2008 |
| JQ612709 | Bangladesh | 2009 |
| JQ612706 | Bangladesh | 2010 |
| JQ612707 | Bangladesh | 2009 |
| FJ905304 | China      | 2007 |
| JF939201 | China      | 2007 |

PPRV Fusion gene sequence information.

| GenBank Nucleotide accession number | Country of origin | Year of isolation |
|-------------------------------------|-------------------|-------------------|
| FJ750562                            | India             | 2003              |
| JQ519965                            | Turkey            | 2011              |
| JQ519948                            | Turkey            | 2011              |
| JQ519942                            | Turkey            | 2011              |
| JQ519934                            | Turkey            | 2011              |
| JQ519921                            | Turkey            | 2010              |
| JQ519907                            | Turkey            | 2011              |
| JQ519950                            | Turkey            | 2011              |
| JQ519946                            | Turkey            | 2011              |
| JQ519939                            | Turkey            | 2011              |
| JQ519932                            | Turkey            | 2011              |
| JQ519924                            | Turkey            | 2011              |
| JQ519919                            | Turkey            | 2011              |
| JQ519915                            | Turkey            | 2011              |
| JQ388663                            | Turkey            | 2011              |
| JQ388659                            | Turkey            | 2010              |
| JQ388647                            | Turkey            | 2011              |
| JQ388643                            | Turkey            | 2010              |
| JQ388635                            | Turkey            | 2010              |
| JQ388627                            | Turkey            | 2011              |
| JQ388653                            | Turkey            | 2011              |
| JQ388641                            | Turkey            | 2011              |
| JQ388633                            | Turkey            | 2011              |
| AY602984                            | India             | 2001              |
| AY602982                            | India             | 2002              |
| AY602983                            | India             | 2002              |
| AY602981                            | India             | 2000              |
| JN632531                            | India             | 2007              |
| JN632534                            | India             | 2007              |
| JN009671                            | Pakistan          | 2010              |
| JN009672                            | Pakistan          | 2010              |
| JF274480                            | Egypt             | 2009              |
| HQ317878                            | Nigeria           | 2009              |
| HQ317876                            | Nigeria           | 2009              |
| HQ317874                            | Nigeria           | 2009              |
| HQ317872                            | Nigeria           | 2009              |
| HQ317879                            | Nigeria           | 2009              |

|          |             |      |
|----------|-------------|------|
| HQ317877 | Nigeria     | 2009 |
| HQ317875 | Nigeria     | 2009 |
| HQ317873 | Nigeria     | 2009 |
| HQ317871 | Nigeria     | 2009 |
| HQ131959 | Sudan       | 2008 |
| HQ131957 | Morocco     | 2008 |
| HQ131955 | Sudan       | 2008 |
| HQ131953 | Sudan       | 2008 |
| HQ131951 | Sudan       | 2005 |
| HQ131949 | Sudan       | 2005 |
| HQ131958 | Morocco     | 2008 |
| HQ131956 | Sudan       | 1971 |
| HQ131954 | Sudan       | 2009 |
| HQ131952 | Sudan       | 2008 |
| HQ131950 | Sudan       | 2005 |
| FR667648 | Nepal       | 1995 |
| FR667646 | Pakistan    | 1994 |
| FR667644 | Kuwait      | 1999 |
| FR667556 | Bangladesh  | 2000 |
| FR667554 | Guinea      | 1991 |
| FN996974 | Nepal       | 2009 |
| FN996000 | Sudan       | 1972 |
| FN995998 | Yemen       | 2009 |
| FN995439 | Iraq        | 2000 |
| FR667649 | Bhutan      | 2010 |
| FR667647 | Turkey      | 1996 |
| FR667645 | SaudiArabia | 1994 |
| FR667557 | Egypt       | 2009 |
| FN996973 | Pakistan    | 2009 |
| FN995999 | Yemen       | 2001 |
| FN995997 | Ethiopia    | 1996 |
| FN995440 | Iraq        | 2002 |
| FN995438 | Iraq        | 2000 |
| HM483509 | Turkey      | 2007 |
| HM483510 | Turkey      | 2006 |
| HM490003 | Turkey      | 2007 |
| HM490001 | Turkey      | 2007 |
| HM490002 | Turkey      | 2007 |
| HM490000 | Turkey      | 2006 |
| GU014576 | India       | 2006 |
| EU344740 | India       | 2003 |

|          |             |      |
|----------|-------------|------|
| EU344743 | India       | 2005 |
| AF464892 | India       | 1996 |
| AF464890 | India       | 1999 |
| AF464888 | India       | 1998 |
| AF464886 | India       | 1999 |
| AF464884 | India       | 1997 |
| AF464882 | India       | 1999 |
| AF464880 | India       | 1998 |
| AF464878 | India       | 1998 |
| AF464891 | India       | 1998 |
| AF464889 | India       | 1998 |
| AF464887 | India       | 1994 |
| AF464885 | India       | 1996 |
| AF464883 | India       | 1996 |
| AF464881 | India       | 1999 |
| AF464879 | India       | 2000 |
| AF384687 | Turkey      | 2000 |
| GQ410434 | India       | 2003 |
| GQ410435 | India       | 2006 |
| EU816772 | China       | 2007 |
| EU815053 | China       | 2007 |
| AM946407 | Pakistan    | 2007 |
| AM945963 | Pakistan    | 2007 |
| EF547922 | Turkey      | 2006 |
| EF547923 | Turkey      | 2007 |
| DQ267187 | India       | 2005 |
| DQ267185 | India       | 2005 |
| DQ267183 | India       | 2005 |
| DQ267186 | India       | 2005 |
| DQ267184 | India       | 2005 |
| EU267274 | Nigeria     | 1976 |
| EU267273 | CotedIvoire | 1989 |
| FR668075 | Ghana       | 2010 |
| FR667553 | Oman        | 1983 |
| FN996975 | UAE         | 1986 |
| FN995205 | Quatar      | 2010 |
| FN995114 | Tanzania    | 2010 |
| FN995206 | Qatar       | 2010 |
